# Supplementary material for: Molecular insight into oil displacement by CO2 flooding in water-cut dead-end nanopores
Source: Royal Society of Chemistry journal article supplement (doi:10.1039/d4ra04962d), 2024-01-01
Supplement: d4ra04962d1.pdf [file d4ra04962d1.pdf]

## Supporting Information

### Molecular Insight into Oil Displacement by CO<sub>2</sub> Flooding in the Water Cut Dead-end Nanopore

Pengfei Lu <sup>a</sup>, Zichen Yan <sup>a</sup>, Jiawen Lai <sup>a</sup>, Keke Wang <sup>b,\*</sup>

<sup>a</sup> Anhui Key Laboratory of Spin Electron and Nanomaterials, School of Chemistry  
and Chemical Engineering, Suzhou University, Suzhou 234000, China

<sup>b</sup> School of Information Engineering, Suzhou University, Suzhou 234000, China

**Table S1.** Lennard-Jones parameters employed in the simulations <sup>1</sup>.

| Atom type                         | $\epsilon$ (kJ/mol)      | $\sigma$ (nm) | $q$ (e) |
|-----------------------------------|--------------------------|---------------|---------|
| OB(O at SiO <sub>2</sub> bulk)    | $6.50629 \times 10^{-1}$ | 0.3166        | -1.050  |
| OS(O at SiO <sub>2</sub> surface) | $6.50629 \times 10^{-1}$ | 0.3166        | -0.950  |
| Si                                | $7.70581 \times 10^{-6}$ | 0.3302        | 2.100   |
| H(at SiO <sub>2</sub> surface)    | 0.000                    | 0.000         | 0.425   |
| H(H <sub>2</sub> O)               | 0.000                    | 0.000         | 0.417   |
| O(H <sub>2</sub> O)               | 0.6364                   | 0.315         | -0.834  |
| C(CO <sub>2</sub> )               | 0.234                    | 0.280         | 0.6516  |
| O(CO <sub>2</sub> )               | 0.6682                   | 0.3028        | -0.3258 |
| CH <sub>2</sub>                   | 0.3808                   | 0.393         | 0.000   |
| CH <sub>3</sub>                   | 0.8647                   | 0.391         | 0.000   |

**Fig. S1.** Snapshots of the systems with different water film thicknesses under 1 MPa during  
displacing process.

**Fig. S2.** Number density distribution of CO<sub>2</sub> and C10 perpendicular to the displacement direction in the groove with different water film thicknesses under the pressure of 1 MPa.

**Fig. S3.** The evolution of water film rupture at 4 MPa.

**Fig. S4.** The evolution of water film rupture at 1 MPa.

**Fig. S5.** The evolution of w-r H-bond number (a) and w-w H-bond number (b) during the simulations under the pressure of 1 MPa.

**Fig. S6.** The change of oil molecule number during the displacing process for different cases.

**Fig. S7.** Oil recovery for the cases with different water contents under 1 MPa and the corresponding fitting curves.

## References

- 1 P. Lu, T. Mo, Y. Wei, Z. Guo and G. Feng, *J. Supercrit. Fluid.*, 2022, 181, 105507.
